# Supplementary material for: Identification and transfer of spatial transcriptomics signatures for cancer diagnosis
Source: PubMed Central journal article supplement (PMC6958738; doi:10.1186/s13058-019-1242-9), 2020-01-13
Supplement: 13058_2019_1242_MOESM1_ESM.pdf [file 13058_2019_1242_MOESM1_ESM.pdf]

# Additional file 1

## Identification and transfer of Spatial Transcriptomics signatures for cancer diagnosis

### Tables

| Dataset | %Trimmed | %ncRNA | %Mapped | %De-multiplexed | %Annotated | #Genes | #Reads  |
|---------|----------|--------|---------|-----------------|------------|--------|---------|
| 1       | 30.59%   | 18.58% | 67.6%   | 97.9%           | 92%        | 23933  | 2337984 |
| 2       | 38.16%   | 10.3%  | 69.2%   | 97.64%          | 94%        | 23523  | 2224597 |
| 3       | 35.49%   | 19.44% | 69.58%  | 97.89%          | 94%        | 24497  | 2637623 |
| 4       | 34.48%   | 10.79% | 75.15%  | 97.37%          | 97%        | 23647  | 2659015 |

**Table S1** : Mapping statistics of four breast cancer datasets.

|                 | Protein coding | Non-coding | Non-annotated | Total  |
|-----------------|----------------|------------|---------------|--------|
| ENSEMBL genes   | 11,251         | 1,902      | -             | 13,153 |
| ST tag clusters | 17,137         | 2,457      | 5,585         | 25,179 |

**Table S2**: ST tag clusters and associated genes for four ST datasets together.

|                                   | 1     | 2     | 3-5   | 6-10 | >10 |
|-----------------------------------|-------|-------|-------|------|-----|
| Number of ST tag cluster per gene | 9,369 | 2,497 | 1,129 | 125  | 33  |

**Table S3**: Number of ST tag clusters per gene for four ST datasets.

|                               | non-malignant | DCIS     | IDC      |
|-------------------------------|---------------|----------|----------|
| ST-TCs                        | 16,895        | 23,823   | 23,211   |
| Genes associated to ST-TCs    | 10,262        | 12,830   | 12,708   |
| Expert annotated ST spots     | 68            | 66       | 60       |
| Correctly classified ST spots | 67 (98%)      | 64 (97%) | 55 (92%) |

**Table S4:** The characteristics of the unsupervised ST breast cancer signatures. ST-TCs with at least one count were considered.
