# Supplementary material for: Identification and transfer of spatial transcriptomics signatures for cancer diagnosis
Source: PubMed Central journal article supplement (PMC6958738; doi:10.1186/s13058-019-1242-9), 2020-01-13

Figure S1

A

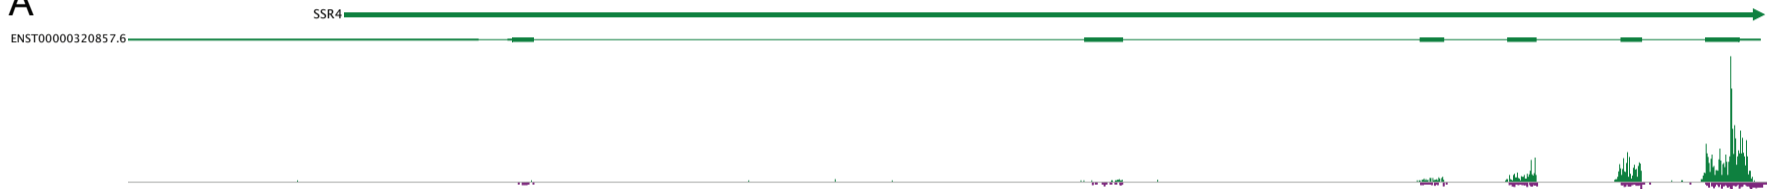

B

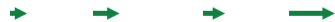

Supplement: 13058_2019_1242_MOESM2_ESM.pdf [file 13058_2019_1242_MOESM2_ESM.pdf]
