# Supplementary material for: Identification and transfer of spatial transcriptomics signatures for cancer diagnosis
Source: Springer Nature journal article supplement (doi:10.1186/s13058-019-1242-9), 2020-01-13

Figure S2

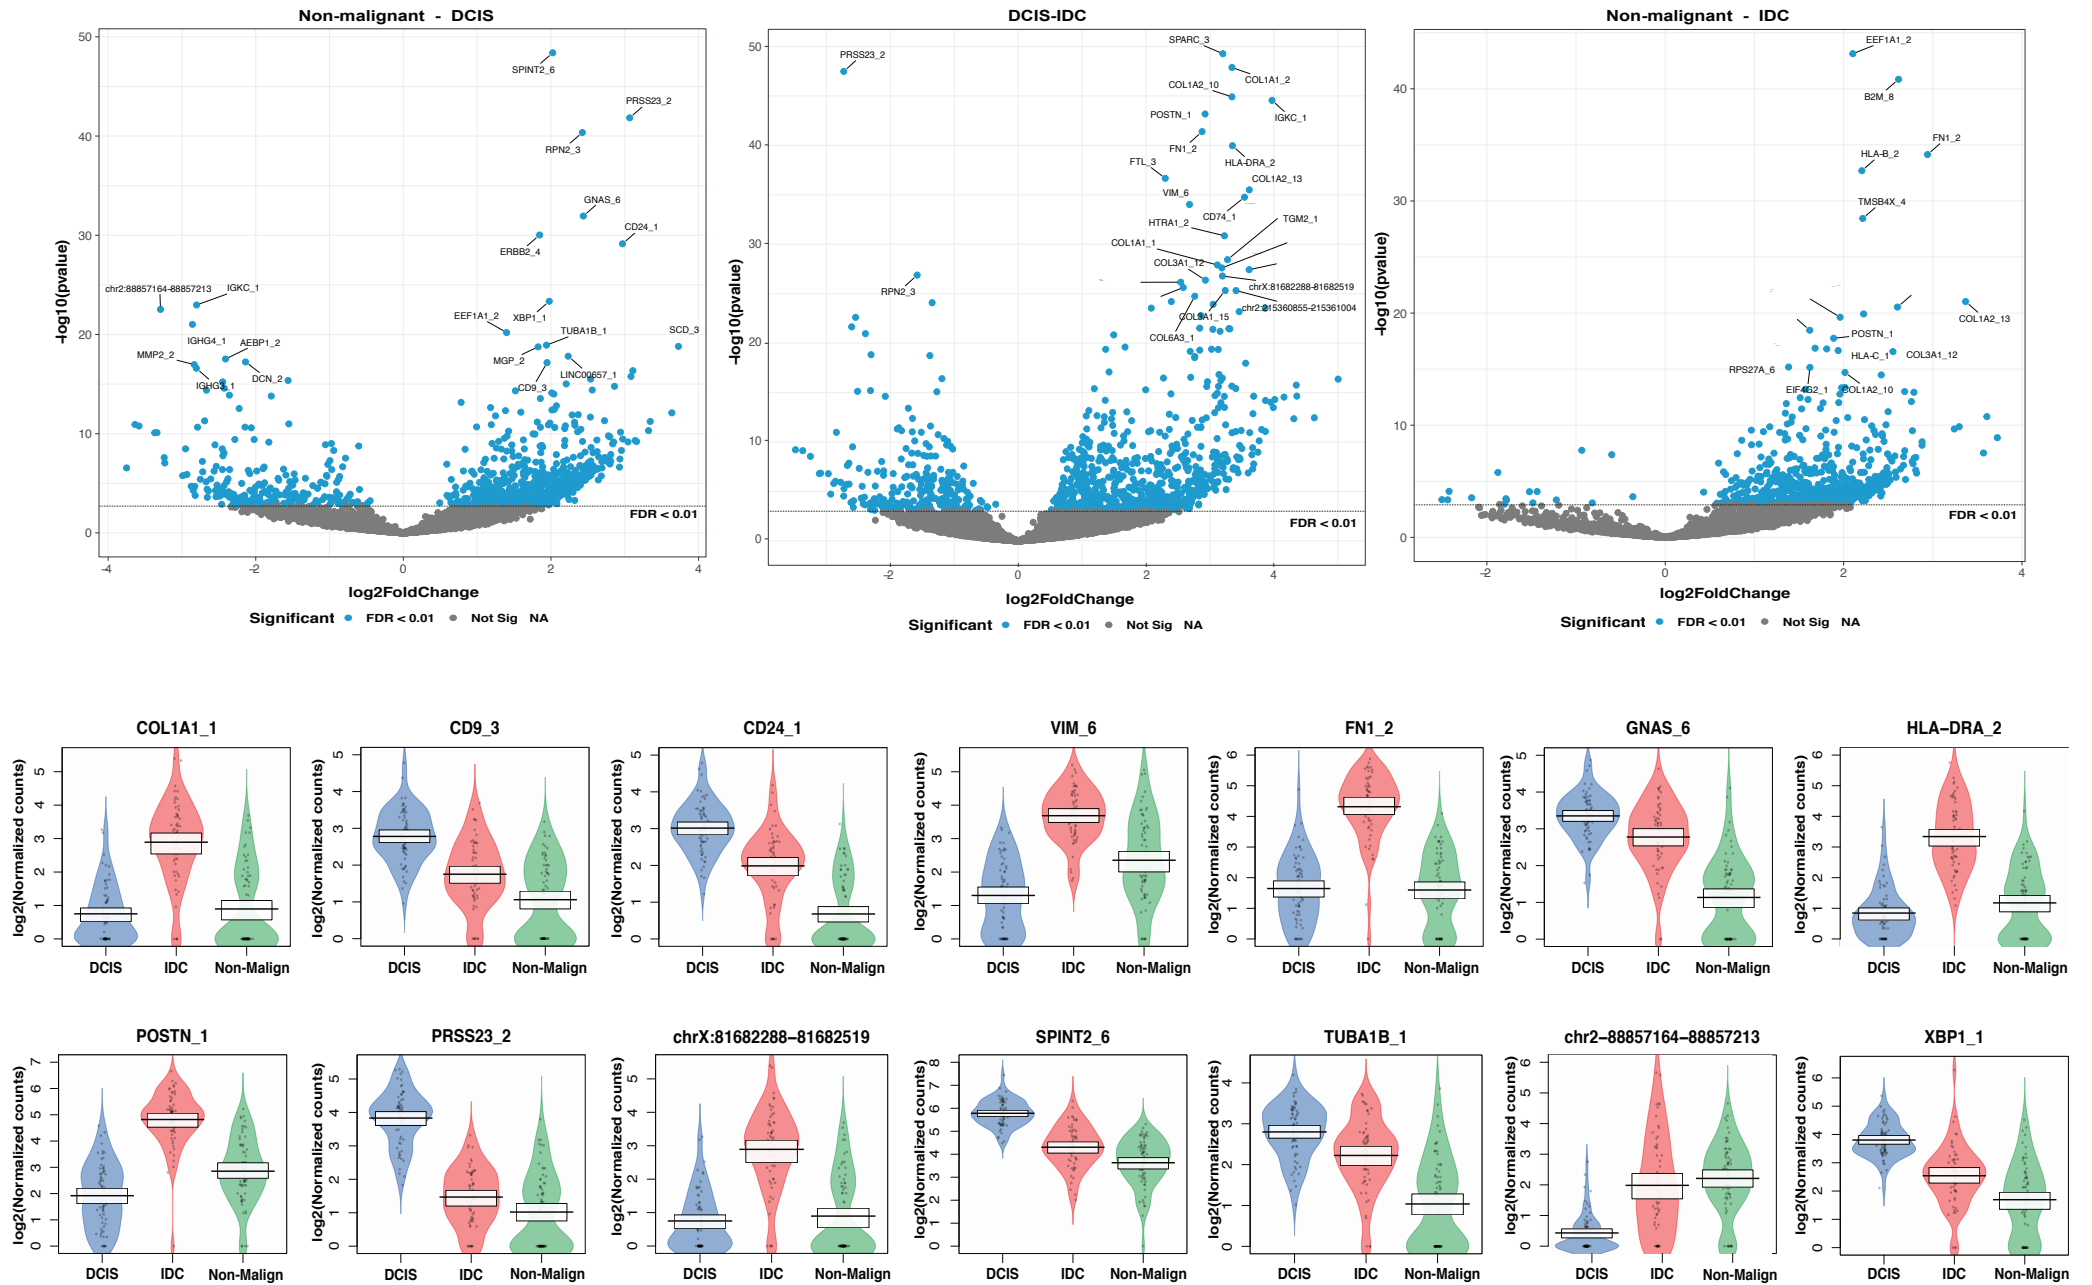

Supplement: MOESM3 [file 17680620]
